# Supplementary material for: The Bibliometric Landscape of Gene Editing Innovation and Regulation in the Worldwide
Source: MDPI journal article supplement (doi:10.3390/cells11172682), 2022-08-29
Supplement: s1 [file s1]

# The Bibliometric Landscape of Gene Editing Innovation and Regulation in the Worldwide

Xun Wei <sup>1,2,\*</sup>, Aqing Pu <sup>1</sup>, Qianqian Liu <sup>1</sup>, Quancan Hou <sup>1,2</sup>, Yong Zhang <sup>2</sup>, Xueli An<sup>1,2</sup>, Yan Long<sup>1,2</sup>, Yilin Jiang <sup>1</sup>, Zhenying Dong<sup>2</sup>, Suowei Wu <sup>1,2</sup> and Xiangyuan Wan <sup>1,2,\*</sup>

<sup>1</sup>Zhongzhi International Institute of Agricultural Biosciences, Research Center of Biology and Agriculture, Shunde Graduate School, University of Science and Technology Beijing, Beijing 100024, China

<sup>2</sup>Beijing Beike Institute of Precision Medicine and Health Technology, Beijing 100192, China

\*Correspondence: weixun@ustb.edu.cn (X.Weiz); wanxiangyuan@ustb.edu.cn (X.Wan); Tel.: +86-189-1087-6260 (X.Weiz); +86-186-0056-1850 (X.Wan)

## Materials and Methods

Records are retrieved and cross-indexed by using entries providing information with regards to manuscript authors, affiliated institutions, publication journals, years, titles and abstracts, spanning manuscripts published between 1999 and 2022 (up to January 19, 2022). The search strategy is based on the gene- editing- related queries (Supplementary Table 1). The literature types are limited to articles and reviews written in English.

Data cleaning is conducted within the retrieved literature to eliminate meetings, newspapers and unrelated literature, and finally streamlined the results of 13,980 valid data. Literature is downloaded after the screening in the format of "summary, full record (including references)," saved as plain text files used for analyzing data samples, and finally imported to Citespace, Scimago Graphica and other visual software. By combining the documentary metrology analysis, visualization analysis and social network analysis from three dimensions of the total amounts, citations and themes, we conclude the basic profiles and development dynamics of gene editing research.

**Supplementary Table S1 Search strategy for investigating gene editing in the Web of Science (updated January. 19, 2022)**

| Component    | Search Strategy                                                                                                                                                                                                                                                                                                                                                                                                                                                                                                                                                                                                                                                                                                                                                                                                                                                                                                        |
|--------------|------------------------------------------------------------------------------------------------------------------------------------------------------------------------------------------------------------------------------------------------------------------------------------------------------------------------------------------------------------------------------------------------------------------------------------------------------------------------------------------------------------------------------------------------------------------------------------------------------------------------------------------------------------------------------------------------------------------------------------------------------------------------------------------------------------------------------------------------------------------------------------------------------------------------|
| Gene editing | TS=(( Meganuclease OR "zinc finger nucleases*" OR "Zinc finger endonuclease*" OR "zinc-finger nucleus" OR "TALE nuclease" OR "TALEN" OR TALN OR TALENS OR TALNS OR "Transcription activator-like effector*" OR "Transcription activator-like nuclease*" OR "TAL effector nucleases" OR "TAL nuclease*" OR "clustered regularly in-terspaced short palindromic repeat*" OR "CRISPR*" OR "RNA-Guided Cas9" OR "ef-ector nucleases" OR "base editing" OR "Multiplex gene editing" OR "Cas9-guide RNA ribonucleoprotein " OR RNP OR "prime editing guide RNA" OR pegRNA OR "Prime editors" OR PE OR "genome editing" OR "gene editing" OR "engineered endonucle-ase*" OR "Engineered nuclease*" OR "site-directed nuclease*" OR "genome engineering" OR "chimeric nucleases" OR "Targeted modification" OR "Sequence-Specific Nucleases" ) AND (( Genome OR Gene OR Genetic) NEAR/2 Editing))                              |
| Meganuclease | TS= Meganuclease                                                                                                                                                                                                                                                                                                                                                                                                                                                                                                                                                                                                                                                                                                                                                                                                                                                                                                       |
| ZFNs         | TS=( "zinc finger nucleases*" OR "Zinc finger endonuclease*" OR "zinc-finger nucleus" )                                                                                                                                                                                                                                                                                                                                                                                                                                                                                                                                                                                                                                                                                                                                                                                                                                |
| TALENs       | TS=("TALE nuclease" OR "TALEN" OR TALN OR TALENS OR TALNS OR "Transcription activator-like effector*" OR "Transcription activator-like nuclease*" OR "TAL effector nucleases" OR "TAL nuclease*")                                                                                                                                                                                                                                                                                                                                                                                                                                                                                                                                                                                                                                                                                                                      |
| CRISPR-Cas   | TS=("clustered regularly in-terspaced short palindromic repeat*" OR "CRISPR*" OR "RNA-Guided Cas9" OR "base editing" OR "Multiplex gene editing" OR "Cas9-guide RNA ribonucleoprotein " OR RNP OR "prime editing guide RNA" OR pegRNA OR "Prime editors" OR PE )                                                                                                                                                                                                                                                                                                                                                                                                                                                                                                                                                                                                                                                       |
| Regulatory   | TS=(Regulat* OR Legistlat*) and (( Meganuclease OR "zinc finger nucleases*" OR "Zinc finger endonuclease*" OR "zinc-finger nucleus" OR "TALE nuclease" OR "TALEN" OR TALN OR TALENS OR TALNS OR "Transcription activator-like effector*" OR "Transcription activator-like nuclease*" OR "TAL effector nucleases" OR "TAL nuclease*" OR "clustered regularly in-terspaced short palindromic repeat*" OR "CRISPR*" OR "RNA-Guided Cas9" OR "ef-ector nucleases" OR "base editing" OR "Multiplex gene editing" OR "Cas9-guide RNA ribonucleoprotein " OR RNP OR "prime editing guide RNA" OR pegRNA OR "Prime editors" OR PE OR "genome editing" OR "gene editing" OR "engineered endonucle-ase*" OR "Engineered nuclease*" OR "site-directed nuclease*" OR "genome engineering" OR "chimeric nucleases" OR "Targeted modification" OR "Sequence-Specific Nucleases" ) AND (( Genome OR Gene OR Genetic) NEAR/2 Editing)) |

TS =Title, Abstract and Keywords; Indexes=SCI-EXPANDED

**Supplementary Table S2 Gene editing-related records**

| No | Document type       | Records | No | Document type                             | Records |
|----|---------------------|---------|----|-------------------------------------------|---------|
| 1  | Article             | 9983    | 10 | Corrections                               | 90      |
| 2  | Review              | 3997    | 11 | Book Reviews                              | 20      |
| 3  | Meeting Abstract    | 1614    | 12 | Data Papers                               | 3       |
| 4  | Editorial Materials | 762     | 13 | Retracted Publications                    | 2       |
| 5  | Book Chapters       | 266     | 14 | Bibliographies                            | 1       |
| 6  | Proceedings Papers  | 190     | 15 | Biographical-Items                        | 1       |
| 7  | Letters             | 180     | 16 | Expression Of Concern                     | 1       |
| 8  | News Items          | 155     | 17 | Publication With<br>Expression Of Concern | 1       |
| 9  | Early Access        | 123     | 18 | Retractions                               | 1       |

Note: Our analysis focuses on published articles and reviews only.

**Supplementary Table S3 Sub-technologies and Sub-sectors publishing on gene editing since 2000**

| Years | Sub-technologies |      |        |              | Sub-sectors |          |             |
|-------|------------------|------|--------|--------------|-------------|----------|-------------|
|       | CRISPR/Cas       | ZFNs | TALENs | Meganuclease | Medicine    | Industry | Agriculture |
| 2000  | 0                | 0    | 0      | 0            | 0           | 0        | 0           |
| 2001  | 0                | 0    | 0      | 0            | 1           | 0        | 0           |
| 2002  | 0                | 0    | 0      | 0            | 0           | 0        | 0           |
| 2003  | 0                | 0    | 0      | 0            | 0           | 0        | 0           |
| 2004  | 0                | 0    | 0      | 0            | 0           | 0        | 0           |
| 2005  | 0                | 2    | 0      | 0            | 5           | 0        | 0           |
| 2006  | 0                | 0    | 0      | 0            | 3           | 0        | 0           |
| 2007  | 0                | 3    | 0      | 0            | 4           | 0        | 0           |
| 2008  | 0                | 3    | 0      | 0            | 2           | 0        | 0           |
| 2009  | 0                | 4    | 0      | 0            | 6           | 0        | 0           |
| 2010  | 0                | 8    | 0      | 0            | 2           | 1        | 0           |
| 2011  | 0                | 31   | 7      | 0            | 20          | 1        | 0           |
| 2012  | 1                | 34   | 18     | 1            | 36          | 6        | 1           |
| 2013  | 45               | 74   | 56     | 2            | 80          | 11       | 1           |
| 2014  | 201              | 168  | 171    | 4            | 223         | 17       | 4           |
| 2015  | 375              | 162  | 146    | 1            | 341         | 74       | 14          |
| 2016  | 691              | 194  | 206    | 6            | 575         | 145      | 37          |
| 2017  | 958              | 154  | 151    | 4            | 751         | 208      | 59          |
| 2018  | 1175             | 161  | 163    | 4            | 979         | 295      | 84          |
| 2019  | 1408             | 93   | 114    | 3            | 1075        | 438      | 134         |
| 2020  | 1547             | 94   | 121    | 4            | 1240        | 534      | 135         |
| 2021  | 1601             | 82   | 114    | 7            | 1333        | 627      | 164         |
| total | 8002             | 1267 | 1267   | 36           | 6676        | 2357     | 633         |

**Supplementary Table S4   Leading countries publishing (GE)**

| <b>Countries</b> | <b>Number of records</b> | <b>Total citations</b> | <b>Average citations</b> |
|------------------|--------------------------|------------------------|--------------------------|
| USA              | 5926                     | 277961                 | 46.91                    |
| China            | 3308                     | 87818                  | 26.55                    |
| Japan            | 1144                     | 26281                  | 22.97                    |
| Germany          | 1071                     | 32795                  | 30.62                    |
| UK               | 1015                     | 29839                  | 29.40                    |
| South Korea      | 558                      | 17460                  | 31.29                    |
| France           | 541                      | 16848                  | 31.14                    |
| Canada           | 528                      | 12122                  | 22.96                    |
| Australia        | 526                      | 10785                  | 20.50                    |
| India            | 491                      | 6408                   | 13.05                    |
| Netherlands      | 444                      | 15737                  | 35.44                    |
| Italy            | 399                      | 12674                  | 31.76                    |
| Spain            | 332                      | 8870                   | 26.72                    |
| Switzerland      | 282                      | 8978                   | 31.84                    |
| Denmark          | 233                      | 7047                   | 30.24                    |
| Scotland         | 212                      | 4734                   | 22.33                    |
| Sweden           | 208                      | 17530                  | 84.28                    |
| Russia           | 195                      | 4345                   | 22.28                    |
| Belgium          | 164                      | 3127                   | 19.07                    |
| Iran             | 152                      | 1600                   | 10.53                    |

**Supplementary Table S5 Frequency of GE keyword occurrence (Top 100)**

| No. | Key Words             | Frequency | No. | Key Words            | Frequency |
|-----|-----------------------|-----------|-----|----------------------|-----------|
| 1   | CRISPR/Cas9           | 2606      | 51  | efficient            | 270       |
| 2   | expression            | 1874      | 52  | cancer               | 265       |
| 3   | gene                  | 1591      | 53  | crystal structure    | 259       |
| 4   | DNA                   | 1217      | 54  | RNA guided           | 259       |
| 5   | genome                | 1184      | 55  | endonuclease         | 256       |
| 6   | mutation              | 1021      | 56  | transformation       | 254       |
| 7   | RNA                   | 963       | 57  | growth               | 248       |
| 8   | protein               | 918       | 58  | transcription factor | 247       |
| 9   | cell                  | 850       | 59  | CRISPR               | 245       |
| 10  | gene therapy          | 776       | 60  | mammalian cell       | 244       |
| 11  | generation            | 749       | 61  | genomic DNA          | 238       |
| 12  | in vivo               | 696       | 62  | T cell               | 234       |
| 13  | nuclease              | 658       | 63  | recombination        | 229       |
| 14  | Zinc Finger Nuclease  | 643       | 64  | inhibition           | 221       |
|     | homologous            |           | 65  | vector               | 216       |
| 15  | recombination         | 634       | 66  | cpf1                 | 216       |
| 16  | endonuclease          | 617       | 67  | reveal               | 208       |
| 17  | specificity           | 611       | 68  | efficiency           | 207       |
| 18  | gene expression       | 608       | 69  | messenger RNA        | 206       |
| 19  | identification        | 605       | 70  | design               | 201       |
| 20  | human cell            | 541       | 71  | binding              | 199       |
| 21  | targeted mutagenesis  | 515       | 72  | base                 | 194       |
| 22  | mouse model           | 514       | 73  | integration          | 191       |
| 23  | mice                  | 512       | 74  | knockout             | 190       |
| 24  | pluripotent stem cell | 511       | 75  | TALEN                | 187       |
| 25  | activation            | 477       | 76  | recognition          | 178       |
| 26  | stem cell             | 469       | 77  | embryonic stem cell  | 177       |
| 27  | in vitro              | 462       | 78  | target               | 171       |
|     | resistance            | 456       | 79  | saccharomyces        | 166       |
| 28  | mechanism             | 425       | 80  | cerevisiae           | 165       |
| 29  | double strand break   | 380       | 81  | receptor             | 161       |
| 30  | delivery              | 377       | 82  | synthetic biology    | 159       |
| 31  | mutagenesis           | 371       | 83  | tool                 | 156       |
| 32  | arabidopsis           | 370       | 84  | infection            | 155       |
| 33  | therapy               | 351       | 85  | arabidopsis thaliana | 154       |
| 34  | transcription         | 350       | 86  | transplantation      | 149       |
| 35  | plant                 | 346       | 87  | genome engineering   | 147       |
| 36  | guide RNA             | 344       | 88  | lentiviral vector    | 145       |
| 37  | disease               | 343       |     | induction            |           |
|     |                       |           |     | gene knockout        |           |

|    |                     |     |     |                               |     |
|----|---------------------|-----|-----|-------------------------------|-----|
| 39 | differentiation     | 343 | 89  | immune system                 | 142 |
| 40 | sequence            | 335 | 90  | replication                   | 141 |
| 41 | model               | 333 | 91  | homology directed repair      | 140 |
| 42 | cleavage            | 330 | 92  | genetic engineering           | 139 |
| 43 | escherichia coli    | 327 | 93  | biosynthesis                  | 139 |
| 44 | one step generation | 313 | 94  | disruption                    | 139 |
| 45 | evolution           | 310 | 95  | deletion                      | 135 |
| 46 | repair              | 308 | 96  | induced pluripotent stem cell | 132 |
| 47 | mouse               | 290 | 97  | DNA cleavage                  | 132 |
| 48 | rice                | 288 | 98  | diversity                     | 130 |
| 49 | complex             | 287 | 99  | CRISPR Cas9 Nuclease          | 130 |
| 50 | pathway             | 270 | 100 | zebrafish                     | 128 |

---

**Supplementary Table S6    Number of publications (Total GE and GE regulatory)**

|      | Number of total GE publications | Number of GE regulatory publications |
|------|---------------------------------|--------------------------------------|
| 1999 | 1                               | 0                                    |
| 2000 | 2                               | 0                                    |
| 2001 | 1                               | 0                                    |
| 2002 | 0                               | 0                                    |
| 2003 | 1                               | 0                                    |
| 2004 | 1                               | 0                                    |
| 2005 | 9                               | 0                                    |
| 2006 | 6                               | 3                                    |
| 2007 | 6                               | 1                                    |
| 2008 | 7                               | 1                                    |
| 2009 | 8                               | 1                                    |
| 2010 | 10                              | 2                                    |
| 2011 | 41                              | 9                                    |
| 2012 | 60                              | 10                                   |
| 2013 | 147                             | 31                                   |
| 2014 | 429                             | 100                                  |
| 2015 | 669                             | 184                                  |
| 2016 | 1133                            | 297                                  |
| 2017 | 1509                            | 455                                  |
| 2018 | 1926                            | 600                                  |
| 2019 | 2320                            | 785                                  |
| 2020 | 2666                            | 850                                  |
| 2021 | 2966                            | 911                                  |



**Supplementary Table S7 Frequency of GE regulatory keyword occurrence (Top 90)**

| No. | Key Words            | Frequency | No. | Key Words            | Frequency |
|-----|----------------------|-----------|-----|----------------------|-----------|
| 1   | expression           | 638       | 46  | efficient            | 79        |
| 2   | genome editing       | 553       | 47  | cancer               | 78        |
| 3   | gene                 | 481       | 48  | crystal structure    | 78        |
| 4   | gene editing         | 318       | 49  | RNA guided           | 77        |
| 5   | protein              | 294       | 50  | endonuclease         | 77        |
| 6   | gene expression      | 283       | 51  | transformation       | 77        |
| 7   | genome               | 263       | 52  | growth               | 75        |
| 8   | system               | 262       | 53  | transcription factor | 73        |
| 9   | cell                 | 246       | 54  | CRISPR               | 72        |
| 10  | mutation             | 242       | 55  | mammalian cell       | 71        |
| 11  | dna                  | 230       | 56  | genomic DNA          | 71        |
| 12  | rna                  | 228       | 57  | T cell               | 68        |
| 13  | identification       | 209       | 58  | recombination        | 68        |
| 14  | activation           | 207       | 59  | inhibition           | 67        |
| 15  | in vivo              | 178       | 60  | vector               | 65        |
| 16  | cas9                 | 174       | 61  | cpf1                 | 63        |
| 17  | transcription        | 173       | 62  | reveal               | 60        |
| 18  | crispr cas9          | 159       | 63  | efficiency           | 59        |
| 19  | targeted mutagenesis | 152       | 64  | messenger RNA        | 59        |
| 20  | transcription factor | 138       | 65  | design               | 59        |
| 21  | differentiation      | 136       | 66  | binding              | 57        |
| 22  | gene therapy         | 134       | 67  | base                 | 56        |
| 23  | generation           | 131       | 68  | integration          | 56        |
| 24  | mechanism            | 124       | 69  | knockout             | 56        |
| 25  | arabidopsis          | 122       | 70  | TALEN                | 55        |
| 26  | mouse model          | 119       | 71  | recognition          | 54        |
| 27  | endonuclease         | 115       | 72  | embryonic stem cell  | 51        |
| 28  | stem cell            | 115       | 73  | target               | 51        |
| 29  | nuclease             | 111       | 74  | saccharomyces        | 51        |
| 30  | resistance           | 111       | 75  | cerevisiae           | 50        |
| 31  | human cell           | 111       | 76  | receptor             | 50        |
| 32  | mice                 | 109       | 77  | synthetic biology    | 50        |
| 33  | homologous           | 108       | 78  | tool                 | 49        |
| 34  | recombination        | 108       | 79  | infection            | 49        |
| 35  | specificity          | 107       | 80  | arabidopsis thaliana | 48        |
| 36  | growth               | 103       | 81  | transplantation      | 48        |
| 37  | in vitro             | 102       | 82  | genome engineering   | 47        |
|     | zinc finger nuclease |           |     | lentiviral vector    | 47        |
|     |                      |           |     | induction            | 47        |

|    |                       |    |    |                          |    |
|----|-----------------------|----|----|--------------------------|----|
| 38 | pathway               | 95 | 83 | gene knockout            | 46 |
| 39 | crispr/cas9           | 94 | 84 | immune system            | 46 |
| 40 | plant                 | 93 | 85 | replication              | 45 |
| 41 | complex               | 93 | 86 | homology directed repair | 45 |
| 42 | pluripotent stem cell | 92 | 87 | genetic engineering      | 44 |
| 43 | escherichia coli      | 87 | 88 | biosynthesis             | 44 |
| 44 | inhibition            | 85 | 89 | disruption               | 44 |
| 45 | double strand break   | 84 | 90 | deletion                 | 41 |

---

**Supplementary Table S8    National cooperation in GE regulatory research**

| No. | Countries   | Count | No. | Countries      | Count |
|-----|-------------|-------|-----|----------------|-------|
| 1   | USA         | 1567  | 22  | Israel         | 41    |
| 2   | China       | 906   | 23  | Iran           | 38    |
| 3   | Germany     | 304   | 24  | Poland         | 33    |
| 4   | Japan       | 298   | 25  | Norway         | 32    |
| 5   | England     | 277   | 26  | Turkey         | 31    |
| 6   | Australia   | 161   | 27  | Brazil         | 28    |
| 7   | India       | 154   | 28  | Saudi Arabia   | 28    |
| 8   | France      | 150   | 29  | New Zealand    | 27    |
| 9   | Canada      | 144   | 30  | Finland        | 27    |
| 10  | Netherlands | 126   | 31  | Taiwan         | 27    |
| 11  | South Korea | 120   | 32  | South Africa   | 27    |
| 12  | Italy       | 114   | 33  | Egypt          | 25    |
| 13  | Spain       | 98    | 34  | Singapore      | 25    |
| 14  | Switzerland | 86    | 35  | Czech Republic | 23    |
| 15  | Sweden      | 80    | 36  | Ireland        | 22    |
| 16  | Scotland    | 67    | 37  | Argentina      | 21    |
| 17  | Russia      | 59    | 38  | Mexico         | 20    |
| 18  | Belgium     | 57    | 39  | Portugal       | 19    |
| 19  | Pakistan    | 52    | 40  | Malaysia       | 17    |
| 20  | Austria     | 48    | 41  | Hungary        | 15    |
| 21  | Denmark     | 45    | 42  | Greece         | 14    |
